# Supplementary material
Source: MDPI journal article supplement (https://www.mdpi.com/2076-3417/10/20/7371)
Supplement: s1 [file s1]

## 1. Gasification

Drying (RStoic) reactor specification

|                       |                                  |
|-----------------------|----------------------------------|
| Temperature (°C)      | 100                              |
| Pressure (bar)        | 1                                |
| Fractional conversion | 0.325 component of pyrolysis-oil |

Decomposition (Ryield) reactor specification

|                  |                  |
|------------------|------------------|
| Temperature (°C) | 500              |
| Pressure (bar)   | 1                |
| Yield options    | Component yields |
| H <sub>2</sub>   | 4.15             |
| C                | 32.8             |
| O <sub>2</sub>   | 30.4             |
| N <sub>2</sub>   | 0.27             |
| S                | 0.001            |

Combustion and gasification (RGibbs) reactor specification

|                    |                                                      |
|--------------------|------------------------------------------------------|
| Calculation option | Calculate phase equilibrium and chemical equilibrium |
| Temperature (°C)   | 800                                                  |
| Pressure (bar)     | 1                                                    |
| Products           | Identity possible products                           |
| Component          | Valid phases                                         |
| CO                 | Mixed                                                |
| H <sub>2</sub>     | Mixed                                                |
| CO <sub>2</sub>    | Mixed                                                |
| CH <sub>4</sub>    | Mixed                                                |
| NH <sub>3</sub>    | Mixed                                                |
| H <sub>2</sub> S   | Mixed                                                |

## 2. Rectisol

Rectisol (RadFrac) block specification

Configuration:

|                  |               |
|------------------|---------------|
| Calculation type | Equilibrium   |
| Number of stages | 15            |
| Condenser        | none          |
| Reboiler         | none          |
| Valid phases     | Vapor- Liquid |
| convergence      | Standard      |

Steams:

Feed streams

| Name | Stage | Convention  |
|------|-------|-------------|
| 9    | 1     | Above-stage |
| 10   | 15    | On-stage    |

Product streams

| Name | Stage | Phase  | Basis | Units   |
|------|-------|--------|-------|---------|
| 11   | 15    | Liquid | Mole  | kmol/hr |
| 12   | 1     | Vapor  | Mole  | kmol/hr |

Pressure:

| View                                | Top/Bottom |
|-------------------------------------|------------|
| Top stage/ Condenser pressure (bar) | 1~80       |

### 3. Methanol synthesis

Methanol synthesis (RPLUG) reactor specifications:

|                          |                                               |
|--------------------------|-----------------------------------------------|
| Reaction type:           | Reactor with specified temperature            |
| Configuration:           |                                               |
| Multitube reactor:       | Number of tubes: 11458                        |
| Tube dimensions:         | Length: 12.0 meter<br>Diameter: 0.03675 meter |
| Catalyst specifications: |                                               |
| Bed voidage              | 0.5                                           |
| Particle density         | 2000 kg/m <sup>3</sup>                        |

Kinetic LHHW Parameters

|                                                               |                                          |
|---------------------------------------------------------------|------------------------------------------|
| R1 (CO <sub>2</sub> + H <sub>2</sub> → CO + H <sub>2</sub> O) |                                          |
| Kinetic factor                                                | k = 1<br>n = 0<br>E = 0 kJ/kmol          |
| Driving-force expressions (partial pressure):                 |                                          |
| Term 1                                                        |                                          |
| Concentration exponents for reactants                         | CO <sub>2</sub> = 1, H <sub>2</sub> = 0  |
| Concentration exponents for products                          | CO = 0, H <sub>2</sub> O = 0             |
| Coefficients:                                                 | A = 4.80, B = -11398.2, C = 0, D = 0     |
| Term 2                                                        |                                          |
| Concentration exponents for reactants                         | CO <sub>2</sub> = 0, H <sub>2</sub> = -1 |
| Concentration exponents for products                          | CO = 1, H <sub>2</sub> O = 1             |
| Coefficients:                                                 | A = 0.13, B = -6624.98, C = 0, D = 0     |

|                            |                                            |
|----------------------------|--------------------------------------------|
| Adsorption expression:     |                                            |
| Adsorption term exponent : | 1                                          |
| Concentration exponents:   |                                            |
| Term 1:                    | H <sub>2</sub> = 0, H <sub>2</sub> O = 0   |
| Term 2:                    | H <sub>2</sub> = -1, H <sub>2</sub> O = 1  |
| Term 3:                    | H <sub>2</sub> = 0.5, H <sub>2</sub> O = 0 |
| Term 4:                    | H <sub>2</sub> = 0, H <sub>2</sub> O = 1   |
| Adsorption constants:      |                                            |
| Term 1:                    | A = 0, B = 0, C = 0, D = 0                 |
| Term 2:                    | A = 8.15, B = 0, C = 0, D = 0              |
| Term 3:                    | A = -6.45, B = 2068.44, C = 0, D = 0       |
| Term 4:                    | A = -34.95, B = 14928.90, C = 0, D = 0     |

|                                                                                |                                              |
|--------------------------------------------------------------------------------|----------------------------------------------|
| R2 (CO <sub>2</sub> + 3H <sub>2</sub> → CH <sub>3</sub> OH + H <sub>2</sub> O) |                                              |
| Kinetic factor                                                                 | k = 1<br>n = 0<br>E = 0 kJ/kmol              |
| Driving-force expressions (partial pressure)                                   |                                              |
| Term 1                                                                         |                                              |
| Concentration exponents for reactants                                          | CO <sub>2</sub> = 1, H <sub>2</sub> = 1      |
| Concentration exponents for products                                           | CH <sub>3</sub> OH = 0, H <sub>2</sub> O = 0 |
| Coefficients:                                                                  | A = -29.87, B = 4413.76, C = 0, D = 0        |
| Term 2:                                                                        |                                              |
| Concentration exponents for reactants                                          | CO <sub>2</sub> = 0, H <sub>2</sub> = -2     |
| Concentration exponents for products                                           | CH <sub>3</sub> OH = 1, H <sub>2</sub> O = 1 |
| Coefficients:                                                                  | A = 17.55, B = -2645.97, C = 0, D = 0        |
| Adsorption expression                                                          |                                              |
| Adsorption term exponent :                                                     | 3                                            |
| Concentration exponents:                                                       |                                              |
| Term 1:                                                                        | H <sub>2</sub> = 0, H <sub>2</sub> O = 0     |
| Term 2:                                                                        | H <sub>2</sub> = -1, H <sub>2</sub> O = 1    |
| Term 3:                                                                        | H <sub>2</sub> = 0.5, H <sub>2</sub> O = 0   |
| Term 4:                                                                        | H <sub>2</sub> = 0, H <sub>2</sub> O = 1     |
| Adsorption constants:                                                          |                                              |
| Term 1:                                                                        | A = 0, B = 0, C = 0, D = 0                   |
| Term 2:                                                                        | A = 8.15, B = 0, C = 0, D = 0                |
| Term 3:                                                                        | A = -6.45, B = 2068.44, C = 0, D = 0         |
| Term 4:                                                                        | A = -34.95, B = 14928.9, C = 0, D = 0        |
